# Supplementary material for: Embodied strategies for public speaking anxiety: evaluation of the Corp-Oral program
Source: PubMed Central journal article supplement (PMC10711069; doi:10.3389/fnhum.2023.1268798), 2023-11-27
Supplement: Image_1.pdf [file Image_1.pdf]

## Supplementary Material

### Article Title

First Author\*, Co-Author, Co-Author

\* **Correspondence:** Corresponding Author: email@uni.edu

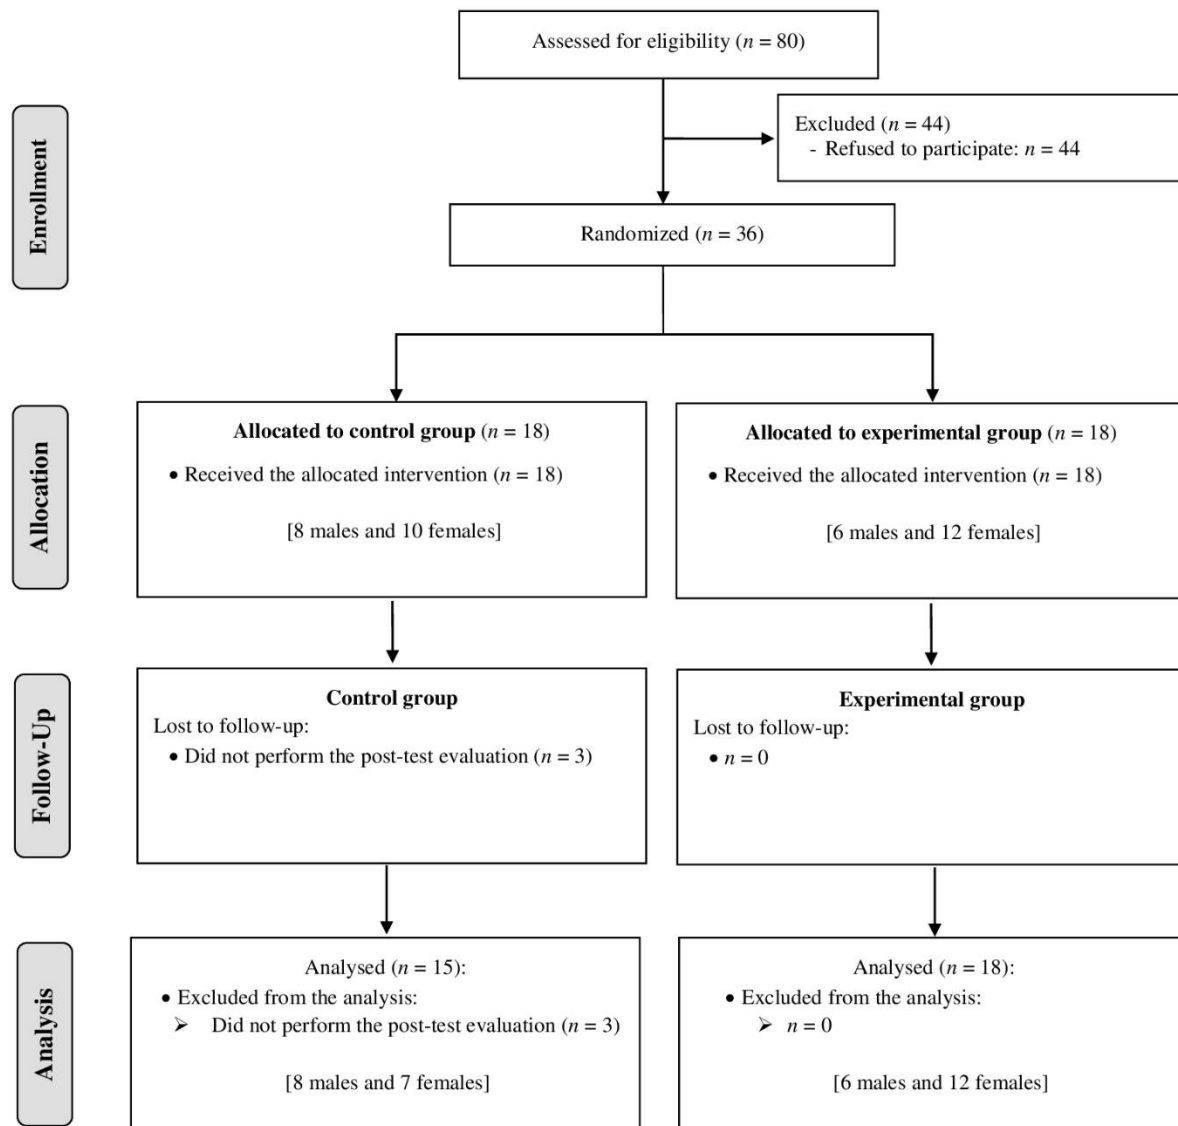

**Supplementary Figure 1.** Flow chart of participants included in the present study.
